# Supplementary material for: AcTor, a novel mTOR stimulator, potentiates ixazomib for the treatment of acute myeloid leukemia
Source: Research Square preprint supplement (doi:10.21203/rs.3.rs-9405584/v1), 2026-04-23
Supplement: Supplementary file 2 [file 7380e3c70f900bb45b2112ec.docx]

**Material and Methods**

**Computational screening of a potential TSC2 inhibitor**

Interactions between TSC2 and Rheb were determined according to the crystal structures of human TSC2 (PDB ID 7DL2 [1]) and GTP-bound Rheb (PDB ID 1XTS [2]), downloaded from the protein databank (<https://www.rscb.org>). The proteins were prepared using default settings in the Molecular Operating Environment (MOE) v. 2022.02 (<https://www.chemcomp.com>) to determine appropriate protonation states and hydrogen bonding networks of amino acid residues and correct any missing loops. The AMBER10 force field was used for partial charges and other atomic parameters [3]. The protein docking program HDOCK was used to dock Rheb towards the GAP domain of TSC2 (**Fig. 1A**), which confirmed the recognition site and catalytic site of TSC2, and the relevant residues in these. The structure obtained is in close agreement with the TSC2-Rheb construct by Yang et al [1].

Further docking details and procedures for mouse xenografts, cell culture, immunoblotting, immunofluorescence, flow cytometry, immunohistochemistry, metabolic analyses, RNAseq, are detailed in the supplemental material.

**Virtual docking**

We virtually docked FDA-approved drugs to the recognition site using the 2021 database of FDA-approved molecules. Molecules were downloaded in mol2 format from the ZINC15 website (<https://zinc15.docking.org>) and prepared using default settings in MOE to ensure relaxed structures and appropriate protonation states. Partial charges were assigned using the MMFF94 force field [4]. Docking was performed in two trenches, targeting either the recognition site or the catalytic site. The catalytic site was defined by residues K1638, R1639, H1640, and N1643, whereas for the recognition site located on the opposite wall of the ‘bowl-shaped’ GAP domain, residues R1529, R1745, K1748, and R1749 of the GaN and GaC helices were selected as the key interaction region, in close agreement with the models explored by Yang et al [1]. The initial screening was performed using rigid receptor docking, 50 poses per ligand using London free energy scoring and GBVI/WSA free energy refinement, keeping the binding pose with the strongest interaction energy for each ligand. The ligands with docking scores better (more negative) than -9 kcal/mol were retained, followed by induced fit docking and the same settings as above. This screen yielded a single molecule with the potential to permeabilize the cell, cobicistat. Having identified Cobicistat as a potent binder from the docking simulations, attempts were made to further enhance the impact on Rheb binding. To this end, the solvent-exposed phenyl ring showing no direct interactions with the TSC2 residues was targeted using the fragment library of MOE and R-group replacement, followed by redocking and evaluation of the docking score / free energy of interaction. Only compounds with docking cores better than -8.0 kcal/mol were retained. The enhancement aims to further fill up the space of the binding region, thus blocking Rheb from fitting into the GAP domain.

**Cell culture**

OCI-AML3, MV4-11, THP-1, KG-1a and HL60 AML cells were purchased from American Type Culture Collection, Manassas, VA. MV4-11 cells were stably transduced with firefly luciferase and used for *in vitro* and *in vivo* studies. Cells were maintained in RPMI 1640 medium, supplemented with with 10% fetal bovine serum (Corning, MT35010CV), 2 mM L-glutamine (Thermo Fisher Scientific, 25030081), 1% penicillin-streptomycin solution (Thermo Fisher Scientific, 15070063), and 1 mM sodium pyruvate (Thermo Fisher Scientific, 11360070) RPMI 8226 cells were also cultured in supplemented RPMI 1640 medium. HEK293T cells were cultured in DMEM, supplemented with the same additives. Venetoclax-resistant AML cells were generated by continuous culturing in the presence of 1 µM venetoclax followed by single cell cloning. Nutlin-3-resistant MV4-11 were described in https://www.biorxiv.org/content/10.1101/404475v1.

An LKO lentiviral vector carrying a TSC2 shRNA 5’ GAGGGTAAACAGACGGAGTTT 3’ was used to generate viruses in 293T HEK cells for transforming MV4-11 and THP-1 cells. shTSC2 cells were established following selection with puromycin (1 µg/ml).

**Cell viability assay for IC50determination**

IC50 measurements were independently performed in the Dr. Petra Joh Research Institute, Frankfurt am Main, Germany, using the institute propriety cell lines.

MV4-11 cells were obtained from DSMZ (Braunschweig, Germany). The resistant sublines were adapted to growth in the presence of the indicated drug concentration by continuous exposure to step-wise increasing drug concentrations as previously described [<https://www.nature.com/articles/cddis2011129>] and are derived from the resistant cancer cell line (RCCL) collection [<https://pmc.ncbi.nlm.nih.gov/articles/PMC8992517>]. The venetoclax-resistant MV4-11 sublines harbour R248W mutations in p53.
All cells were propagated in Iscove’s modified Dulbecco’s medium (IMDM) supplemented with 10% foetal calf serum, 100 IU/mL penicillin, and 100 µg/mL streptomycin at 37 °C. The drug-adapted sublines were continuously cultured in the presence of the indicated drug concentrations. The cells were routinely tested for mycoplasma contamination and authenticated by short tandem repeat profiling.

Cell viability was determined by CellTiter-Glow assay (Promega) according to the manufacturer’s instructions. 2 × 104 cells suspended in 100 µL of cell culture medium were plated per well in 96-well plates and incubated in the presence of the indicated drug concentrations. After this, the cells were lysed using 200 µL and analyzed. After subtracting of the background luminiscence, the results are expressed as percentage viability relative to control cultures, which received no drug. The drug concentrations that inhibited cell viability by 50% (IC50) were determined using CalcuSyn (Biosoft, Cambridge, UK).

**Primary AML culturing and survival**

All patients provided informed consent before study enrollment (study ID: IRB00117251). Bone marrow aspirates were collected in sodium-heparinized Cell Preparation Tubes (CPT) (BD Biosciences #362761, Franklin Lakes, NJ) and centrifuged at 1,800 x g for 15 min from patients undergoing confirmatory diagnosis for a range of hematological malignancies. Patients with confirmed AML were enrolled in the study. Mononuclear cells were isolated and then washed in ACK lysis buffer to remove red blood cells and used immediately for experiments or banked in the vapor phase of liquid nitrogen prior to experimentation. Primary AML cells of six different adult donors were subjected to short-term culture in IMDM-Glutamax, supplemented with 10% FBS, Kit ligand/SCF (100ng/mL), GM-CSF (20ng/mL), and IL-3 (20ng/mL). Cells were exposed to Actor (10µM), IXZ (10-30nM) or the combination of Actor plus IXZ for 48hrs. At the conclusion of the incubation period, viable cell count was determined using the trypan blue exclusion assay in a Vi-CELL BLU Cell Viability Analyzer (Beckman Coulter Life Sciences).

**Mouse xenograft**

All mouse studies were performed in accordance with recommendations in Guide for the Care and Use of Laboratory Animals of the National Institutes of Health and conducted under an approved IACUC protocol by the Case Comprehensive Cancer Center Preclinical & Translational Shared Resource. NOD.Cg-*Prkdcscid Il2rgtm1Wjl*/SzJ (NSG) mice were obtained from The Jackson Laboratory (Bar Harbor, ME). AML engraftments were performed in six-month-old female mice (Jackson Laboratory, Bar Harbor, ME). This mouse age corresponds to humans in their fourth decade and represents a suitable model for adult AML. NSG can display aggressive behaviour. For cost considerations, we worked with females owing to their more docile behaviour, which allows housing in larger groups. Mice were injected i.v. with 150 µl of Hank’s Balanced Salt Solution containing 1x106 luciferase-expressing MV4-11 cells per mouse. Animals were randomly assigned to experimental cohorts (n=12 per group). Leukemia progression was monitored by *in vivo* bioluminescence imaging. Representative images shown for day 16, which illustrate disease progression and were also used for quantitative analysis of treatment effect. For illustrative imaging, five animals from each group were randomly selected. Before imaging, mice received an intraperitoneal injection of D-luciferin (100mg/kg). Anesthesia was induced and maintained with vaporized isoflurane (Abbott Laboratories, IL, USA) before keeping the mice in the imaging chamber. Bioluminescence signals were acquired eight minutes after luciferin injection using a fixed exposure time of 60 seconds. Quantitative analysis of luminescence signals was performed using Living Image software (PerkinElmer). Photon emission was quantified as average radiance (Photons/s/cm2/sr) within the region of interest (whole body).

**Drug treatment in vivo and monitoring of tumor progression by bioluminescence**

Mice were randomly grouped into 4 cohorts. Group 1 received the control treatment, groups 2 and 3 were given IXZ at different concentrations, and groups 3 and 4 received a combination of AcTor/IXZ. AcTor was dissolved in 0.2% Tween 80 in sterile water at a concentration of 30 mg/kg. IXZ was dissolved in 2% 2-hydroxypropyl-β-cyclodextrin in sterile water at a concentration of 0.625 mg/kg. Three days after the challenge mice were treated i.p. with vehicle, 30 mg/kg of AcTor, 1 mg/kg, or 0.5 mg/kg of IXZ. Treatment was given every other day. AML engrafted mice underwent *in vivo* bioluminescence imaging at various times at least twice a week. Animals were monitored daily and were euthanized upon signs of leukemia onset (weight loss >15%, decreased activity, and/or hind limb paralysis). A group of 7 mice from each group was monitored for overall survival analysis.

Progression of MV4-11 Luciferase cells was monitored over time using bioluminescence imaging with the IVIS Spectrum (PerkinElmer, USA). Before imaging, each mouse was injected intraperitoneally with D-luciferin (100 mg/kg). Mice were anesthetized with vaporized isoflurane (Abbott Laboratories, Abbott Park, IL) and placed in an imaging chamber. After 7 min, each animal was imaged with an exposure time of 1 min for each position, bi-weekly for 3 weeks. All bioluminescent image data were provided by Living Image - Newton (for Spectrum data), Amira, Matlab, USA. Photons detected from leukemia models were converted to average radiance (photon/sec/cm2/sr). Average radiance values are quantitative data obtained from region of interest (ROI) where photons emitted by bioluminescent cells of assigned rectangular area over the whole body of each mouse. Both luminescence and image data were analyzed using Living Image software.

**Patient-derived xenograft models**

Frozen cytarabine-relapse-refractory AML or *TP53*-mutant complex cytogenetic AML patient-derived xenograft (PDX) samples were thawed and expanded in NOD.Cg-Prkdc^scid Il2rd^tm1Wjl/SzJ (NSG) mice. For initial expansion, 1.5 × 106 viable leukemic cells were injected into recipient mice through the tail vein. Approximately five weeks after transplantation, mice were sacrificed, and splenocytes were harvested. Cells were washed twice in PBS and resuspended in Hank’s Balanced Salt Solution (HBSS) at a concentration 2 x 106 cells in 150 µL and immediately transplanted into secondary recipient mice via tail vein injection. Peripheral blood was monitored periodically for human engraftment by flow cytometry using anti-human CD45RA antibodies. Once human leukemic chimerism reached at least 70% hCD45RA+ (typically 3 – 4 weeks after transplantation), which represents the aggressive tumor burden, mice were randomized into treatment groups. For the relapse-refractory AML PDX mice model, the mice received the following treatments: Vehicle control, IXZ (1mg/kg), AcTor (30mg/kg), or AcTor+IXZ combination. All treatments were administered intraperitoneally every other day for 21 days. Each treatment group consisted of 8 mice. All animals were observed daily for any sign of distress and were provided nutritional supplements/ care as needed.

To evaluate the efficacy in TP53-mutant AML, the treatments were initiated once the confirmation of aggressive engraftment reached comparable levels between cohorts. There were two treatment regimens for AcTor/IXZ combination, such as short-term treatment (3-weeks) and long-term treatment (6-weeks). Mice received Vehicle, IXZ (1 mg/kg), AcTor (30mg/kg), or AcTor/IXZ combination for short-term therapy, and in the long-term therapy group, only AcTor/IXZ combination (for 6-weeks) on alternate days. After the experimental endpoints or at the time of euthanasia, bone marrow and spleen were collected for flowcytometry analysis for CD45RA+ CD33+, or CD34+CD38- cells, respectively.

Moreover, to access the translational relevance of AcTor-based combination, a parallel study was performed comparing the AcTor/IXZ with the standard of care treatment regimen Decitabine (0.6 mg/kg) plus Venetoclax (25 mg/kg) every alternate day for 6-weeks [5, 6]. Animals were monitored for overall survival and signs of disease distress. As this is an aggressive model of AML, the humane endpoints include progressive weight loss, lethargy, impaired mobility, or any symptoms of advanced leukemia.

**Immunoblotting**

Live cells were isolated by a centrifugation step over a lymphoprep gradient. Cells of the interphase were isolated and washed twice with ice cold PBS. Cell pellets were lysed in RIPA buffer supplemented with protease inhibitors (Bimake, b14001) and phosphatase inhibitors (Bimake, b15001). Following strong vortex for 10 min, lysates were cleared by centrifugation (4˚C, 16,000×g for 15 min). Supernatant was separated, protein content was quantified and mixed with reducing sample buffer followed by boiling for 5 min. Samples were loaded on SDS-PAGE and resolved by electrophoresis (120V) and then transferred to PVDF membrane (4˚C, 100V, for 1.5h). Thereafter, membrane was blocked with 5% skim milk dissolved in TBST (at RT for 1h), washed (3 times, 5 min each), then incubated with primary antibody (at 4˚C for 16-24h), washed then incubated with anti-mouse or anti-rabbit horseradish peroxidase (HRP)-conjugated secondary antibody (at RT for 1h), washed then detected by chemiluminescence using Immobilon® Crescendo (Millipore, WBLUR0500) and imaged on Bio-Rad ChemiDoc™ XR. Antibodies were used according to the manufacturer’s instruction and listed here: anti-P-S6 (CST #5364) anti-S6 (CST #2217), anti-P-4EBP1 (CST #9459), anti-4EBP1 (CST #9644), anti-S6K1 (CST #9202), anti-P-S6K1 (CST #9205), anti-tubulin (CST #9099), total OxPhos (ab110413; Abcam). Goat anti-mouse and goat anti-rabbit HRP-conjugated secondary antibodies were purchased from Jackson ImmunoResearch Laboratories. Rheb•GTP levels were measured using a commercial kit of New East Biosciences (cat# 26910) using the manufacturer’s instructions.

**Cellular thermal shift assay**

Target engagement of AcTor with TSC2 was assessed using a cellular thermal shift assay (CETSA) [7, 8]. MV4-11 cells were treated with AcTor (10µM) or vehicle (DMSO) for 24h at 37 °C. Cells were harvested, washed with cold PBS, and resuspended in lysis buffer supplemented with protease inhibitors. Alliquots of cell lysates were distributed across a temperature gradient (49° - 65 °C) and heated for 3 minutes in a thermal cycler to induce thermal denaturation of proteins. Samples were immediately cooled on ice and centrifuged to separate soluble proteins from thermally aggregated cellular material. The soluble fractions were collected, processed, and analyzed by SDS-PAGE followed by western blotting using a TSC2-specific antibody (CST, #3612, 1:1000). Ponceau (CST, #59803) staining was used to confirm equal protein loading. Band intensities correspond to TSC2, which were quantified by densitometry and normalized to the lowest temperature condition. Thermal stability curves were generated by plotting the fraction of soluble TSC2 against temperature. Increased retention of soluble TSC2 in AcTor-treated samples relative to vehicle controls was interpreted as ligand-induced stabilization.

**Drug affinity responsive target stability assay**

MV4-11 cells were lysed in non-denaturing lysis buffer in the presence of EDTA-free mild protease inhibitor cocktail. After centrifugation, the lysates were incubated with AcTor (10uM) or DMSO for 30 minutes at room temperature. Limited proteolysis was performed by the addition of pronase (Sigma Millipore# 537088, at 1:300 enzyme-to-protein ratio) and incubated for 30 mins. Parallel samples from AcTor and DMSO, without pronase treatment were included in the study to confirm equal lysate input. Proteolysis was terminated by the addition of excess protease inhibitor cocktail followed by SDS sample buffer and heated at 95 oC. the process samples were resolved by SDS-PAGE and analyzed by Western blotting with anti-TSC2 (CST, # 3612, 1:1000). Stabilization of TSC2 in AcTor-treated lysates relative to controls was interpreted as protection from pronase-mediated degradation, which justifies small molecule-protein engagement. Immunoblotting of vinculin was also performed to confirm efficient proteolysis in pronase-treated samples, while no-protease controls verified equal protein loading.

**Immunofluorescence**

Cells in suspension were seeded on slides by cytospin (Thermo Scientific) and then fixed with 4% paraformaldehyde (PFA). After 10 min of permeabilization by 0.5% Triton X-100, the cells were incubated for 1 h with a mouse anti-ADM2 primary antibody (ThermoScientific, USA, 1:200) and for another 1 h with the secondary antibody (Alexa-Fluor 647-conjugated, Jackson ImmunoResearch Inc.,USA 1:400) and with DAPI-mounting media (Vector Laboratories VECTASHIELD Antifade Mounting Medium with DAPI, Cole-Parmer North America, USA). The stained cells were observed under confocal laser scanning microscope Leica TCS SP8 LIGHTNING confocal microscope (Leica, USA). For mitochondrial staining after the treatment, all four groups of cells were collected and cytospun on glass slides. Cells were then incubated with MitoTraker Red FM and MitoTraker Green FM (Thermo Fisher Scientific) at the manufacturer-recommended protocol in pre-warmed cultured medium for 20 minutes at 37 °C. Cells were then washed in PBS, and nuclei were counterstained with DAPI. Slides were mounted using antifade mounting medium and imaged immediately by Leica TCS SP8 LIGHTNING confocal microscope.

**Flow cytometry**

Cells were passed through 70 µm cell strainers (Stellar Scientific, MD, USA). When isolated from mice, red blood cells were lysed prior to staining. Cell surface markers were stained for 30 minutes at room temperature. For the AML-PDX analysis to detect the AML blasts/LSCs & corresponding apoptosis cells, the following antibodies were used: Alexa Fluor® 700 anti-human CD34 (BioLegend, 343621); APC anti-human CD38 each (BioLegend, 356605); Alexa Fluor® 488 anti-human CD45RA (Biolegend, 304114); PE anti-human CD33 each (Biolegend, 303404); APC Annexin V (640920, BioLegend); Annexin V /FITC (185209000, Invitrogen) PerCP/Cyanine5.5 anti-mouse CD45.1 (110728, BioLegend) . PE anti-human CD11b (Biolegend, 379903); PE anti-human CD14 (Biolegend, 301805); PE anti-human CD15 (Biolegend, 376307); Isotype controls were purchased from Biolegend & BD Bioscience. Samples were analysed by CytoFLEX S (Beckman Coulter) using CytExpert software. For viability measurements, cells were washed once with PBS, treated with propidium iodide (PI) (Thermo Fisher Scientific; P3566) or SYTOX-Green Nucleic acid stain (S7020, ThermoFisher Scietific) or 7-AAD viability Staining solution (420404, BioLegend) and immediately analysed by flow cytometry.

For analyses of HSC we applied the protocol of Morcos et al [9]. Bone marrow samples were collected from each group and processed into single-cell suspensions. After red blood cell lysis, the remaining cells were stained for Lin-Sca1+c-Kit+ markers using the FITC anti-mouse Lineage Cocktail, BioLegend, USA; BD OptiBuild™ BV650 Rat Anti-Mouse Ly-6A/E(Sca1) (BD Bioscience, USA); APC/Cyanine7 anti-mouse CD117 (c-kit), BioLegend, USA)]. HSCs were analyzed by gating on the LSKs (multipotent hematopoietic cells) for CD48− CD150+ (BD OptiBuild™ BV605 Hamster Anti-Mouse CD48, BD Bioscience, USA, BD Horizon™ BV510 Rat Anti-Mouse CD150, BD Bioscience, USA).

Mitochondrial Superoxide (MitoSOX) & ROS Production: After treatment with the respective drugs 5×106 MV4-11 cells were resuspended in 1mL preheated medium without serum and incubated with 1 μM MitoSOXTM Red (Thermo Fisher, cat#M36008) at 37°C for 20 min. After washing, the expression of MitoSOX (Ex/Em = 396/610) was quantified by flow cytometry. A similar protocol was followed for each treatment to quantify ROS (Ex/Em = 492/527) in MV4-11 cells, using 2',7'-dichlorodihydrofluorescein diacetate (1.5µM H2DCFDA, D399, Invitrogen™, ThermofisherScientific, USA) as an indicator. Mitochondrial membrane potential was determined using JC-1 dye (Thermo Fisher Scientific). Cells were treated with DMSO, AcTor, IXZ and AcTor/IXZ for specific period between 18 to 24hrs (based on cell type). Following treatment, cells were incubated with JC-1 dye in pre-warmed MEMalfa medium for 20 min at 37oC, washed with PBS and analyzed by flow cytometry. Loss of membrane potential was determined by the shift from JC-1 aggregates (red) to JC-1 monomers (green).

**Immunohistochemistry**

For immunohistochemistry of Ki67, tissues were fixed in 4% paraformaldehyde, dehydrated, embedded in wax, and sectioned at 5 μm. Paraffin-embedded sections were de-waxed, re-hydrated, and rinsed in PBS. After boiling for 10 min in 10 mmol/L sodium citrate buffer (pH 6.0), the sections were blocked in 1% BSA in PBS for 1 h at room temperature, then incubated overnight at 4 °C with Ki67 primary antibody. The stained slides were washed in 1 × PBS/0.1% Tween-20 three times for 5 min each and incubated at room temperature for 1 h with the secondary antibody. Then, processed with the substrate reaction according to the instructions of Ki67 Kit (VitroView *in situ* Ki67 IHC/DAB Detection Kit, VB-4002-D, VitroVivo Biotech, USA)

**Analysis of hypoxia in the bone marrow**

The Hypoxyprobe™ (pimonidazole hydrochloride) was resuspended at a concentration of 30 mg/ml in 0.9% sterile saline. After the treatment period, mice were given an intravenous injection of PIMO solution (60 mg/kg) through the tail vein. Ninety minutes later, the mice in the PIMO-treated group were euthanized, and their hindlimb bones were collected. The samples were fixed in paraformaldehyde, decalcified, and cut into 8 µm sections using a Leica RM2255 Rotary Microtome (Leica Biosystems, USA). The sections were then stained with an FITC-conjugated anti-pimonidazole primary antibody (Pab27, 4.3.11.3, Hydroxyprobe Inc., Burlington, MA, USA) as described previously [10], and counterstained with PE/Cyanine5 anti-human CD33 antibody (Cat no. 303406, BioLegend, USA). Imaging was performed using a Leica TCS SP8 confocal microscope (Leica Biosystems, USA).

**Masson's trichrome staining**

Bones from randomly selected animals in each group were fixed in 4% paraformaldehyde for 24 hours, then decalcified, embedded in paraffin, and cut into 5 μm sections. The tissue sections were stained using Masson's trichrome as per the manufacture instructions (75845, Trichrome Staining Kit, CP Lab Chemicals, CA, USA) and microscopically examined.

**Measurement of mitochondrial respiratory activity**

Oxygen consumption rate (OCR) measurements were performed in Seahorse XF HS Mini Analyzer (Agilent) by using Mito Stress test kit (Agilent, 103015-100) according to the manufacturer’s instructions. Cells were seeded at a density of 3x104 cells per well in a Seahorse XF assay medium into XF HS Mini FluxPak (103723, Agilent). Oligomycin and FCCP were added to a final concentration of 2 μM, rotenone and antimycin A were added to a final concentration of 0.5 μM.

High-resolution respirometry was performed using an Oroboros Oxgraph-2k (O2k; Oroboros Instruments, Innsbruck, Austria) in either a 0.5 or 1.0 mL reaction volume at 37°C. Approximately 1-2×106 cells were harvested and centrifuged at 300 x *g*. After centrifugation, cells were washed in PBS and centrifuged again at 300 x *g*. Cells were then resuspended in either 0.5mL or 1mL of Respiratory Buffer supplemented with creatine (105mM MES potassium salt, 30mM KCl, 8mM NaCl, 1mM EGTA, 10mM KH2PO4, 5mM MgCl2, 0.25% BSA, 5mM creatine monohydrate, pH 7.2). Assay additions were as follows: digitonin (0.015mg/mL; ‘Digi’); creatine kinase, phosphocreatine, ATP (20U/mL, 1mM, 5mM; ‘ΔGATP-54’); cytochrome C (0.01mM; ‘Cyt C’); pyruvate/malate (5mM/1mM; ‘Pyr/Mal’); glutamate (5mM; ‘Glut’); octanoyl-carnitine (0.2mM; ‘Oct-Carn’); rotenone (0.5µM; ‘Rot’); succinate (10mM; ‘Succ’); antimycin a (0.5µM; ‘Ant A’); *N,N,N',N'*-Tetramethyl-*p*-phenylenediamine dihydrochloride /ascorbate (0.5mM/2mM; ‘TMPD/Asc’). Data were normalized to viable cell count using Trypan Blue (0.4%) (Thermofisher; 15250-061).

**RNA Seq Analysis**

Total RNA was obtained from live cells of each treatment group using TRIzol RNA Isolation Reagents (Thermo Fisher Scientific). For eliminating contaminating genomic DNA, we treated the RNA samples with the DNase I Kit (AMPD1, Sigma-Aldrich, MO, USA). Subsequent RNA purification was accomplished using the RNeasy Mini Kit (74104, Qiagen, USA). Following quality control, the RNA samples were subjected to RNA sequencing with PolyA selection and NEB Ultra II Directional RNA Library Prep Kit by Admera Health, LLC, NJ. Differentially expressed genes were then evaluated for all groups using the DESeq2 package in Galaxy, EU, and R. The cutoff to determine significant genes in all groups were false discovery rate–adjusted P value (q value) of <0.05. The Venn diagrams were calculated using Bioinformatics & Evolutionary Genomics, Belgium. The gene ontology and other genomic analysis were performed using an online database from David Functional Annotation Bioinformatics Microarray Analysis, NIH, USA, and SRplot, Chinese Academy of Sciences, Shanghai Jiaotong University, Xiangya School of Medicine. Enrichment scores were calculated using a chi-square test comparing the proportion of the gene list in a group to the proportion of the background genes and the gene set enrichment analysis online-tools from Broad Institute, Inc., Massachusetts Institute of Technology, and Regents of the University of California.

***In vivo* toxicity assessment**

Potential toxicity associated with AcTor and AcTor/IXZ treatment was evaluated in immunocompetent mice. C57BL/6J mice were treated with vehicle, AcTor (30mg/kg), Ixazomib (1 mg/kg), or a combination of AcTor and IXZ for three weeks. Body weight was recorded every other day throughout the experiment period to monitor systemic tolerance. To assess hepatic toxicity, blood samples were collected at the end of the treatment period, and serum was collected by centrifugation. Serum alanine aminotransferase (ALT) and aspartate aminotransferase (AST) activities were measured using standard clinical chemistry assays. For histopathological analysis, tissues were harvested and fixed in 10% buffered formalin, embedded in paraffin, sectioned (6 μm), and stained with hematoxylin-eosin. Liver spleen morphology was examined following a high dose of AcTor (300mg/kg) to evaluate potential acute toxicity. Tissue sections were analyzed under bright-field microscopy and assessed for structural integrity of hepatic lobules, architecture of hepatocytes, sinusoidal spaces, and central veins. Splenic architecture was also accessed including periarteriolar lymphoid sheaths, red pulp, and lymphoid follicles. Besides, all vital organ architecture was also evaluated after H&E staining of the corresponding sections. Moreover, immune cell populations in the spleen were also stained with fluorophore-conjugated antibodies against B220 and CD3. Additionally, complete blood count was measured using an automated hematology analyzer to evaluate hematopoietic toxicity. Bone marrow sections were examined histologically, and megakaryocyte abundance was assessed as previously described in [11]. The hematopoietic stem cell (HSC) compartment was also evaluated by isolating cells from the femur and tibia of three-week-treated mice. Isolated cells were incubated with a lineage antibody cocktail to exclude differentiated hematopoietic cells, followed by staining for antibodies against Sca-1 and c-Kit to identify the Lin-Sca1+cKit+ stem and progenitor cell population. Long-term HSCs were further defined based on expression of Cd150 and absence of CD48 (CD150+CD48-). Data were analyzed using CytExpert Software.

**Statistical analysis**

Statistical analysis was performed using GraphPad Prism software 11.0.0 (93). For the comparisons involving more than two groups, differences were evaluated using Welch’s ANOVA with Brown-Forsythe correction, which does not assume equal variances between groups. When a significant difference was detected in the analysis, comparisons were performed using appropriate post hoc tests, such as Dunnett’s T3 multiple-comparison test. Survival curves were generated using the Kaplan-Meier method and compared using the log-rank (Mantel-Cox) test. For experiments involving multiple groups during survival analysis, pairwise comparisons were adjusted using the Holm- Šídák method. When data did not satisfy assumptions of normality or equal variance, comparisons among multiple groups were performed using the non-parametric Kruskal-Wallis test, followed by Dunn’s multiple comparisons test for post hoc analysis. The PDX-AML data for AML blasts and LSCs were visualized using a violin plot, showing the median value. The comparisons between the two groups were performed using a two-tailed unpaired Student’s t-test to calculate the difference between the two groups. Data are presented as mean ± SD unless otherwise indicated. A *P* values < 0.05 was considered statistically significant.

**References:**

1. Yang H, Yu Z, Chen X, Li J, Li N, Cheng J, Gao N, Yuan HX, Ye D, Guan KL, Xu Y: **Structural insights into TSC complex assembly and GAP activity on Rheb.** *Nat Commun* 2021, **12:**339.

2. Yu Y, Li S, Xu X, Li Y, Guan K, Arnold E, Ding J: **Structural basis for the unique biological function of small GTPase RHEB.** *J Biol Chem* 2005, **280:**17093-17100.

3. Yan Y, Tao H, He J, Huang SY: **The HDOCK server for integrated protein-protein docking.** *Nat Protoc* 2020, **15:**1829-1852.

4. Halgren TA: **MMFF VII. Characterization of MMFF94, MMFF94s, and other widely available force fields for conformational energies and for intermolecular-interaction energies and geometries.** *J Comput Chem* 1999, **20:**730-748.

5. Fischer MA, Friedlander SY, Arrate MP, Chang H, Gorska AE, Fuller LD, Ramsey HE, Kashyap T, Argueta C, Debler S, et al: **Venetoclax response is enhanced by selective inhibitor of nuclear export compounds in hematologic malignancies.** *Blood Adv* 2020, **4:**586-598.

6. Soumier A, Sibille E: **Opposing effects of acute versus chronic blockade of frontal cortex somatostatin-positive inhibitory neurons on behavioral emotionality in mice.** *Neuropsychopharmacology* 2014, **39:**2252-2262.

7. Reckzeh ES, Brockmeyer A, Metz M, Waldmann H, Janning P: **Target Engagement of Small Molecules: Thermal Profiling Approaches on Different Levels.** *Methods Mol Biol* 2019, **1888:**73-98.

8. Axelsson H, Almqvist H, Seashore-Ludlow B, Lundback T: **Screening for Target Engagement using the Cellular Thermal Shift Assay - CETSA.** In *Assay Guidance Manual.* Edited by Markossian S, Grossman A, Baskir H, Arkin M, Auld D, Austin C, Baell J, Brimacombe K, Chung TDY, Coussens NP*, et al*. Bethesda (MD)2004

9. Morcos MNF, Li C, Munz CM, Greco A, Dressel N, Reinhardt S, Sameith K, Dahl A, Becker NB, Roers A, et al: **Fate mapping of hematopoietic stem cells reveals two pathways of native thrombopoiesis.** *Nat Commun* 2022, **13:**4504.

10. Aguilera KY, Brekken RA: **Hypoxia Studies with Pimonidazole in vivo.** *Bio Protoc* 2014, **4**.

11. Corrao F, Zizzo MG, Tutone M, Melfi R, Fiduccia I, Carollo PS, Leonardo AD, Caldara G, Perriera R, Pace A, et al: **Nonsense codons suppression. An acute toxicity study of three optimized TRIDs in murine model, safety and tolerability evaluation.** *Biomed Pharmacother* 2022, **156:**113886.
